# Supplementary material
Source: PubMed Central journal article supplement (PMC7102492)
Supplement: NIHMS1567217-supplement-Supplementary_Information.pdf [file NIHMS1567217-supplement-Supplementary_Information.pdf]

## Supplementary Information

# Why some targets benefit from beyond rule of five drugs

*Megan Egbert, Adrian Whitty<sup>2\*</sup>, György M. Keserű<sup>3\*</sup> and Sandor Vajda<sup>1,2\*</sup>*

Department of Biomedical Engineering, Boston University; 44 Cummington Mall, Boston, MA 02215

\*e-mail: [vajda@bu.edu](mailto:vajda@bu.edu)

|                               |     |
|-------------------------------|-----|
| Supplementary Table S1 .....  | S2  |
| Supplementary Figure S1 ..... | S3  |
| Supplementary Figure S2 ..... | S4  |
| Supplementary Figure S3 ..... | S5  |
| Supplementary Figure S4 ..... | S6  |
| Supplementary Figure S5 ..... | S7  |
| Supplementary Figure S6 ..... | S8  |
| Supplementary Figure S7 ..... | S9  |
| Supplementary Figure S8 ..... | S10 |

**Table S1.** Statistical Analysis for ligand binding profiles

| Protein Name                           | Type        | n   | pBA vs. MW |         |          |         | pBA vs. total probes associated |         |         |         |
|----------------------------------------|-------------|-----|------------|---------|----------|---------|---------------------------------|---------|---------|---------|
|                                        |             |     | slope      | r-value | p-value  | std err | slope                           | r-value | p-value | std err |
| HIV-1 Protease                         | Complex I   | 325 | 0.0007     | 0.0440  | 0.4297   | 0.0009  | 0.0696                          | 0.2758  | 0.0000  | 0.0135  |
| Heat Shock Protein 90                  | Complex I   | 155 | 0.0099     | 0.5656  | 1.74E-14 | 0.0012  | 0.1000                          | 0.2992  | 0.0002  | 0.0258  |
| Thrombin                               | Complex I   | 150 | 0.0096     | 0.5426  | 7.33E-13 | 0.0012  | 0.1377                          | 0.4314  | 0.0000  | 0.0237  |
| MAP Kinase p38                         | Complex I   | 144 | 0.0098     | 0.5649  | 1.65E-13 | 0.0012  | 0.0517                          | 0.3239  | 0.0001  | 0.0127  |
| Bromodomain BRD4                       | Complex I   | 113 | 0.0061     | 0.4624  | 2.53E-07 | 0.0011  | 0.0587                          | 0.3306  | 0.0003  | 0.0159  |
| Renin                                  | Complex I   | 62  | 0.0125     | 0.7545  | 1.43E-12 | 0.0014  | 0.0875                          | 0.5468  | 0.0000  | 0.0173  |
| PPAR-γ                                 | Complex I   | 52  | 0.0105     | 0.7280  | 9.65E-10 | 0.0014  | 0.0833                          | 0.3058  | 0.0275  | 0.0367  |
| MAP Kinase Kinase                      | Complex I   | 25  | 0.0127     | 0.7209  | 4.80E-05 | 0.0025  | 0.1120                          | 0.5396  | 0.0054  | 0.0364  |
| E3 ubiquitin-protein ligase X1AP       | Complex I   | 20  | 0.0043     | 0.6479  | 0.0020   | 0.0012  | 0.0767                          | 0.7756  | 0.0001  | 0.0147  |
| Epidermal Growth Factor Receptor       | Complex II  | 59  | -0.0005    | -0.0312 | 0.8148   | 0.0023  | 0.0420                          | 0.2160  | 0.1004  | 0.0251  |
| Hepatocyte Growth Factor Receptor      | Complex II  | 54  | 0.0012     | 0.1306  | 0.3467   | 0.0012  | 0.0142                          | 0.1887  | 0.1719  | 0.0102  |
| Anaplastic Lymphoma Kinase             | Complex II  | 32  | -0.0041    | -0.2366 | 0.1922   | 0.0031  | 0.0829                          | 0.1724  | 0.3454  | 0.0864  |
| Tyrosine Protein Kinase ABL1           | Complex II  | 28  | -0.0018    | -0.1283 | 0.5151   | 0.0027  | -0.0538                         | -0.4417 | 0.0186  | 0.0214  |
| VEGFR-2                                | Complex II  | 24  | 0.0081     | 0.3254  | 0.1208   | 0.0050  | 0.0477                          | 0.3163  | 0.1321  | 0.0305  |
| Polo-like Kinase 1                     | Complex II  | 11  | 0.0094     | 0.3350  | 0.3139   | 0.0089  | -0.2332                         | -0.8796 | 0.0004  | 0.042   |
| Glucocorticoid Receptor                | Complex II  | 9   | 0.0013     | 0.1416  | 0.7164   | 0.0034  | -0.0368                         | -0.2591 | 0.5009  | 0.0518  |
| Cyclophilin A                          | Complex III | 8   | 0.0055     | 0.8306  | 0.0107   | 0.0015  | 0.8359                          | 0.8616  | 0.0060  | 0.2011  |
| Bcl-2                                  | Complex III | 7   | 0.0072     | 0.7173  | 0.0696   | 0.0031  | 0.0307                          | 0.2305  | 0.6189  | 0.0579  |
| DOT1-like Histone H3 Methyltransferase | Complex III | 5   | 0.0192     | 0.9930  | 0.0007   | 0.0013  | 0.1668                          | 0.9704  | 0.0061  | 0.024   |
| Phosphoinositide-3 Kinase              | Simple      | 64  | 0.0079     | 0.5629  | 1.29E-06 | 0.0015  | -                               | -       | -       | -       |
| Soluble Acetylcholine Receptor         | Simple      | 36  | 0.0055     | 0.5078  | 0.0016   | 0.0016  | -                               | -       | -       | -       |
| Protein Farnesyltransferase            | Simple      | 34  | -0.0038    | -0.3003 | 0.0844   | 0.0021  | -                               | -       | -       | -       |
| Kinesin Eg5                            | Simple      | 28  | 0.0072     | 0.4866  | 0.0087   | 0.0026  | -                               | -       | -       | -       |
| HMG-CoA Reductase                      | Simple      | 19  | 0.0039     | 0.2570  | 0.2882   | 0.0036  | -                               | -       | -       | -       |
| Hepatitis C Virus NS5b Subunit         | Simple      | 8   | 0.0031     | 0.3434  | 0.4049   | 0.0035  | -                               | -       | -       | -       |
| Hepatitis C Virus NS34A Protease       | Simple      | 5   | 0.0019     | 0.2692  | 0.6614   | 0.0039  | -                               | -       | -       | -       |

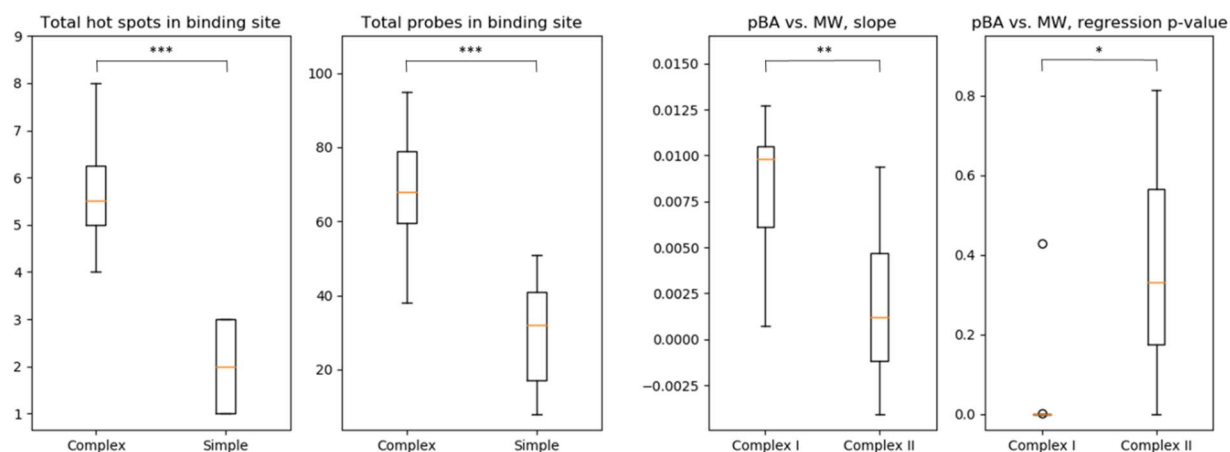

**Figure S1.** Statistical Analysis between **a)** “Complex” and “Simple” binding sites for the 37 protein targets. Total number of hot spots (nHS) in the binding site (left) has  $nHS_{Complex} = 5.625$  and  $nHS_{Simple} = 2.15$ , Wilcoxon-Mann-Whitney p-value =  $2.66 \text{ E}-7$ . Total number of probe clusters (PC) in the binding site (right) has  $PC_{Complex} = 68.88$ ,  $PC_{Simple} = 29.85$ , Wilcoxon-Mann-Whitney p-value =  $9.75 \text{ E}-7$ . **b)** “Complex I” and “Complex II” regression for pBA vs. MW ligand binding profiles. Slope (left) has  $slope_{Complex I} = 0.0085$ ,  $slope_{Complex II} = 0.0019$ , Wilcoxon-Mann-Whitney p-value =  $0.0064$ . Regression p-value (right) has  $pvalue_{Complex I} = 0.048$ ,  $pvalue_{Complex II} = 0.377$ , Wilcoxon-Mann-Whitney p-value =  $0.013$ . (HIV-1 protease is the clear outlier, with slope =  $0.0007$  and p-value  $0.4297$ , as explained in the text).

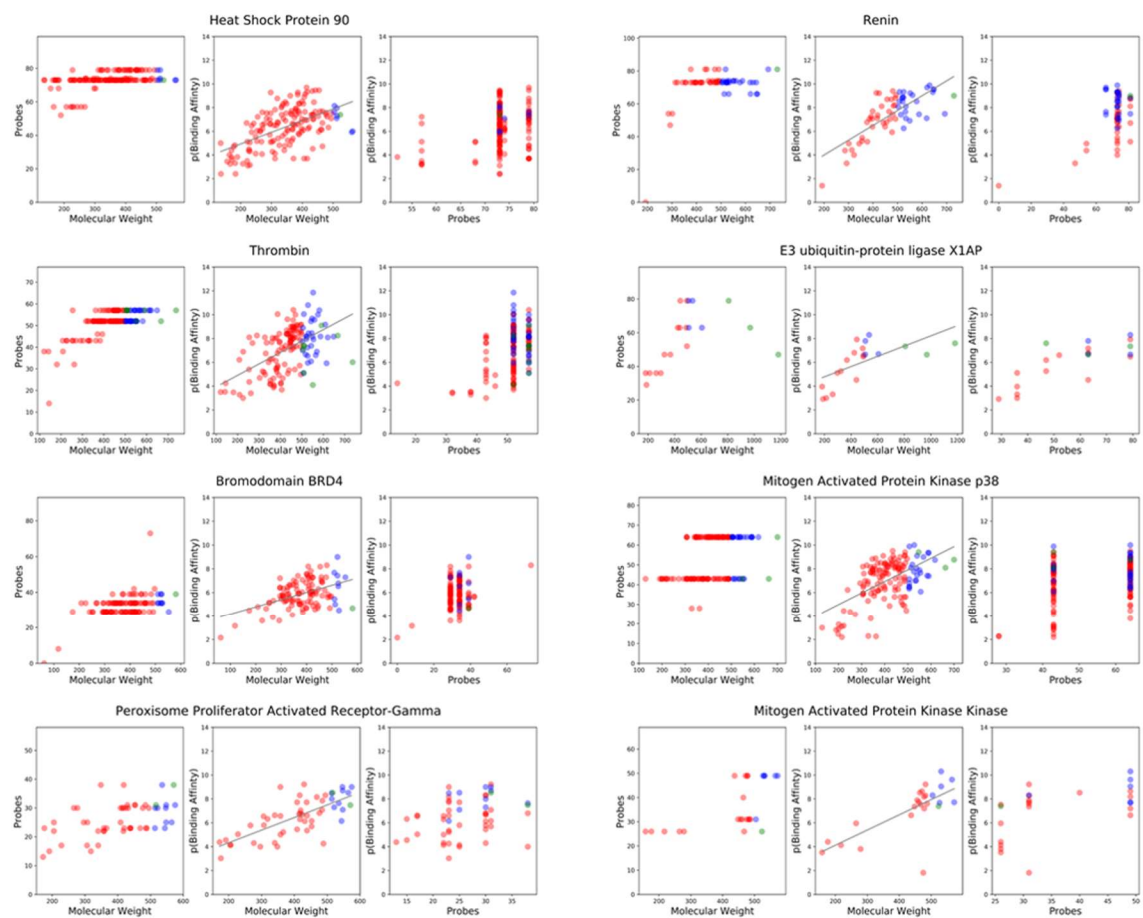

**Figure S2.** Structure-based ligand binding profiles of Complex I targets (excluding HIV-1 Protease, shown in Figure 4) with known binding affinity and co-crystal structures with the protein. *Probes* represents the total number of probe clusters utilized by the ligand. *p(Binding Affinity)* is the negative log of the binding affinity, expressed as  $K_D$ ,  $K_I$ , or  $IC_{50}$ . *Molecular weight* is that of the ligand, measured in Daltons. Legend: Red = ligands with MW < 500 Da, Blue = eRo5 ligands, Green = bRo5 ligands (see Methods).

a) Heat Shock Protein 90

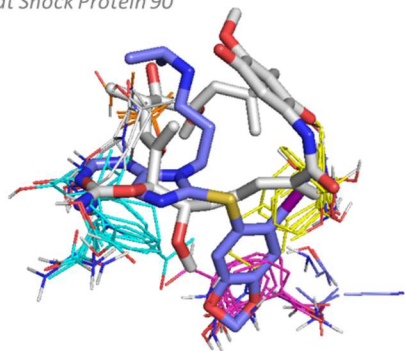

b) Mitogen activated protein kinase kinase

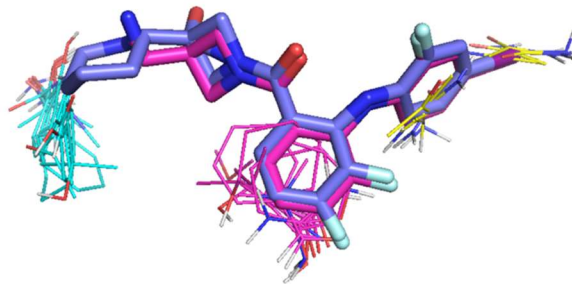

c) Bromodomain-containing protein 4

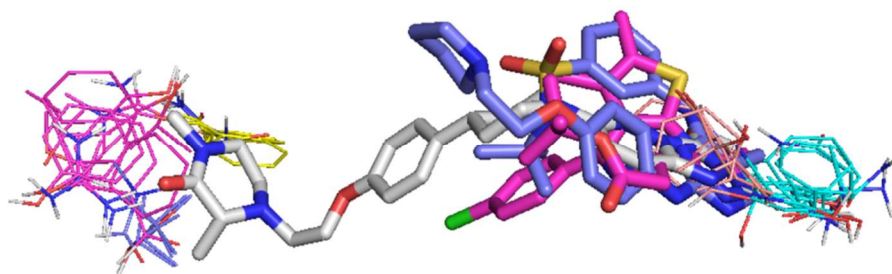

d) Peroxisome proliferator-activated receptor  $\gamma$

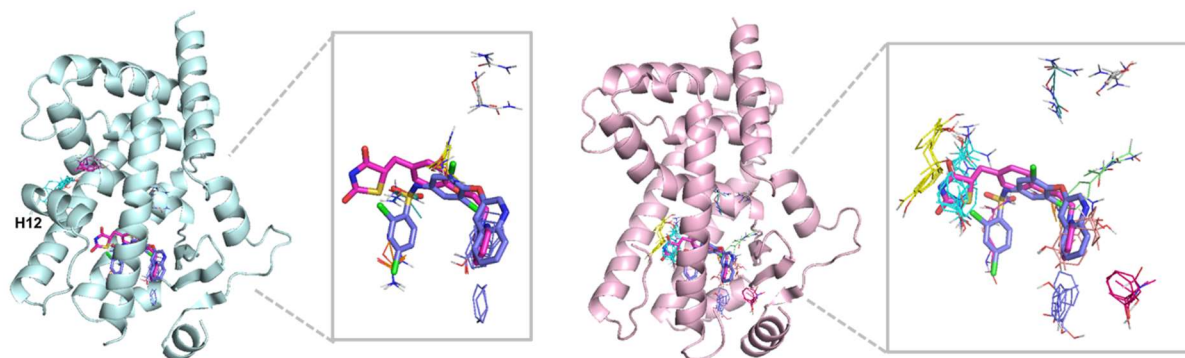

**Figure S3.** Ligand – binding site interactions for additional complex I targets. FTMap hot spots are colored according to standard output, described in Figure 1. **a)** Hot spot structure of heat shock protein 90. Blue = PU-H71 (2FWZ: H71, MW=512.37 Da,  $IC_{50}$ =50 nM, pBA = 7.30). White = geldanamycin (1YET: GDM, MW = 560.64 Da,  $K_D$  = 1.2  $\mu$ M, pBA = 5.92). **b)** Hot spot structure of MEK1. Pink = (4ANB:YQY, MW = 477.22 Da,  $IC_{50}$  = 6.6 nM, pBA = 8.8). Blue = Cobimetinib (4AN2:EUI, MW = 531.31 Da,  $IC_{50}$  = 0.9 nM, pBA = 9.05). **c)** Hot spot structure of BRD4. Pink = JQ1 (3MXF:JQ1, MW = 458.00 Da,  $K_D$  = 49 nM, pBA = 7.31). Blue = fedratinib (4OGJ: 2TA, MW = 524.68 Da,  $K_D$  = 164 nM, pBA = 6.79). White = (5KHM: XNH, MW = 479.57 Da,  $K_i$  = 5 nM, pBA = 8.3). **d)** FTMap hot spots for PPAR $\gamma$  in a ligand-bound structure (3FUR, left, light blue) and a ligand-free structure (2WHR, right, light pink) overlaid with ligands: pink = rosiglitazone (1ZGY:BRL, MW = 357.43 Da,  $K_i$  = 1.0 nM, pBA = 9) and blue = INT131 (3FUR:Z12, MW = 514.21 Da,  $K_i$  = 10 nM, pBA = 8).

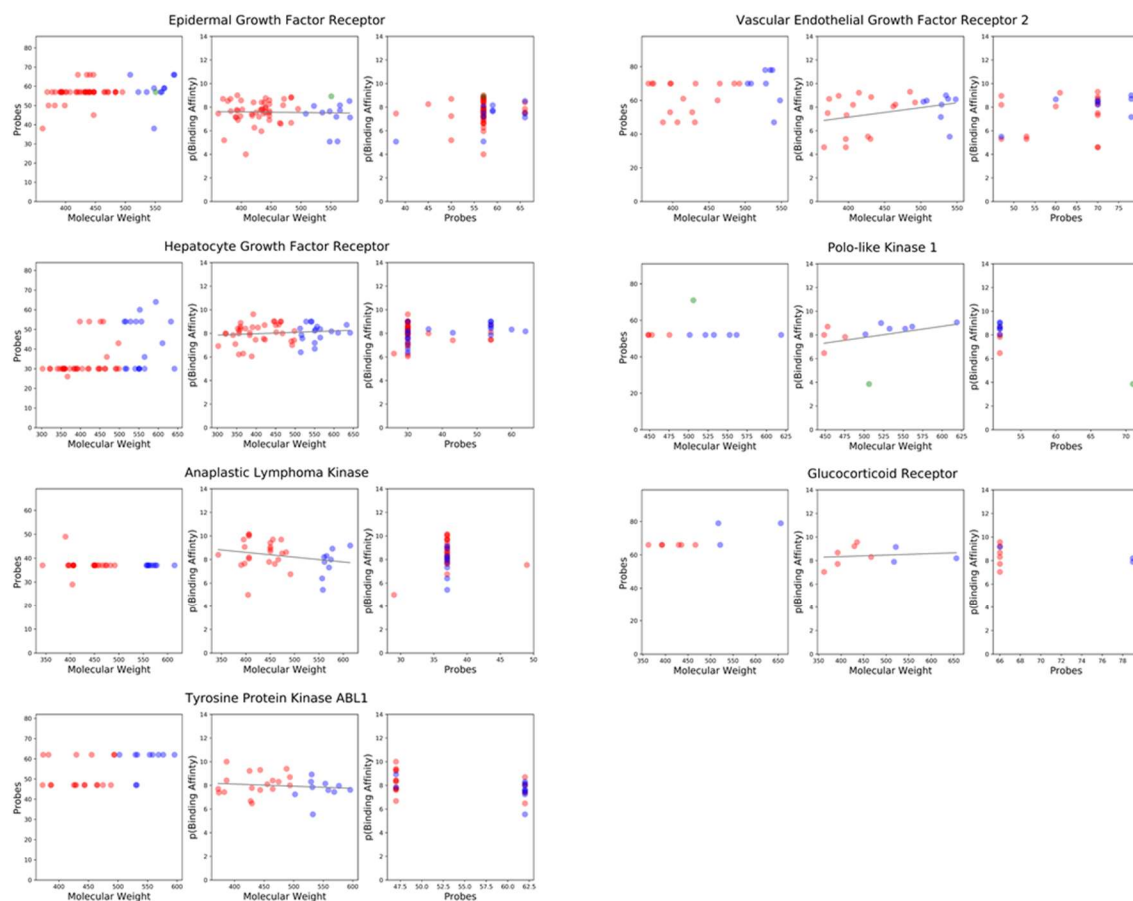

**Figure S4.** Structure-based ligand binding profiles of Complex II targets with known binding affinity and co-crystal structures with the protein. *Probes* represents the total number of probe clusters utilized by the ligand. *p(Binding Affinity)* is the negative log of the binding affinity, expressed as  $K_D$ ,  $K_i$ , or  $IC_{50}$ . *Molecular weight* is that of the ligand, measured in Daltons. Legend: Red = ligands with MW < 500 Da, Blue = eRo5 ligands, Green = bRo5 ligands (see Methods).

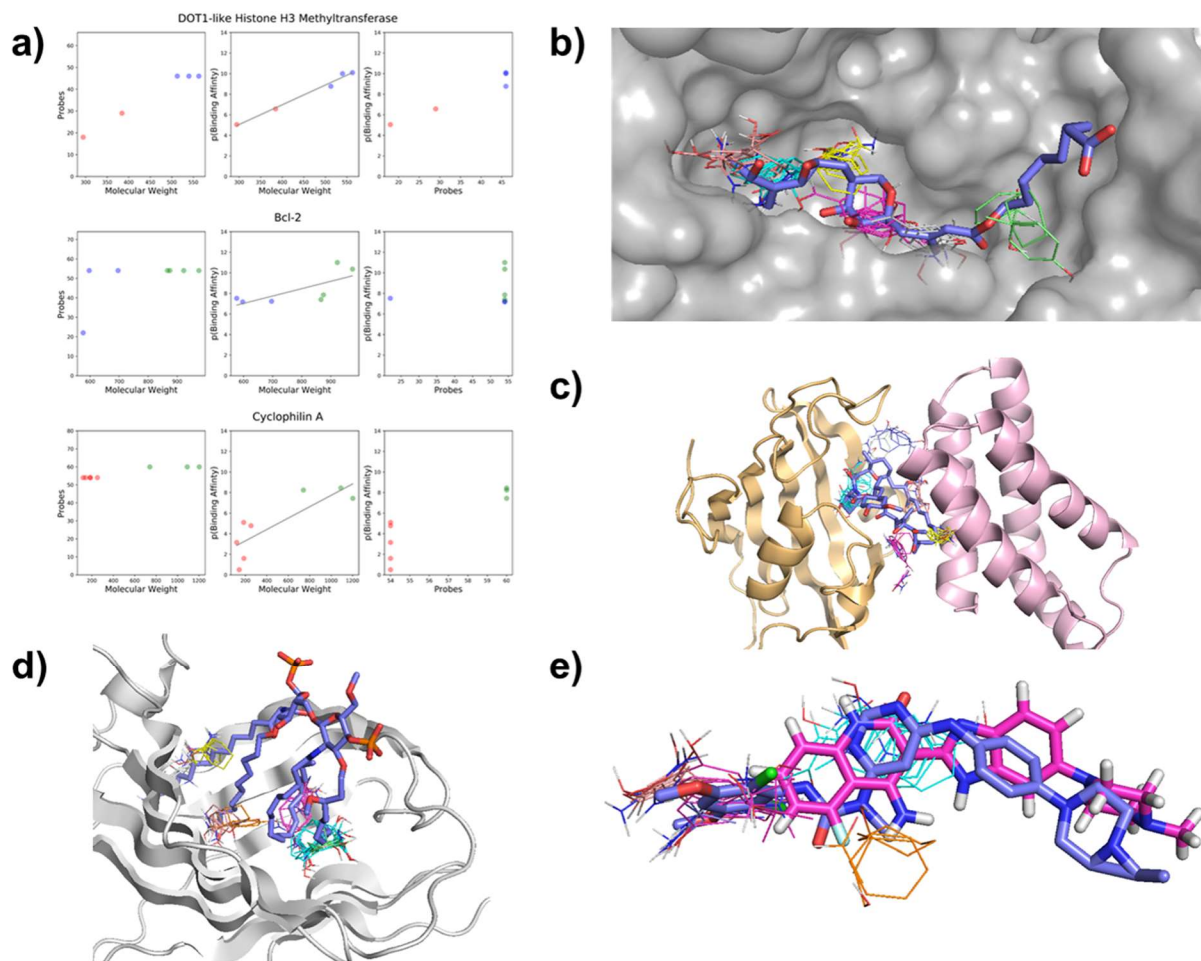

**Figure S5.** Binding information for additional targets in Complex III. Hot spots are identified by FTMap and colored according to standard output (Figure 1). **a)** Structure-based ligand binding profiles of DOT1-like histone H3 methyltransferase, Bcl-2, and Cyclophilin A. **b)** Binding of pseudomonic acid A (1QU2:MRC, MW = 500.6 Da, KD = 0.14 nM, pBA = 9.85) to isoleucyl-tRNA synthetase. **c)** Binding of rapamycin (4DRI:RAP, MW = 914.17 Da,  $K_i$  = 1.0 nM, pBA = 9) to FKBP12 (left, light orange) and mTOR (right, light pink). **d)** Binding of eritoran (2Z65:E55, MW = 1317.7 Da,  $IC_{50}$  = 1.5 nM, pBA = 8.82) to toll-like receptor 4. **e)** Hot spot structure of FGFR1 bound to: pink = dovitinib (5A46: 38O, MW = 392.43 Da, no binding affinity data), blue = BGJ398 (3TT0:07J, MW = 560.5 Da,  $K_i$  = 13 nM, pBA = 7.89).

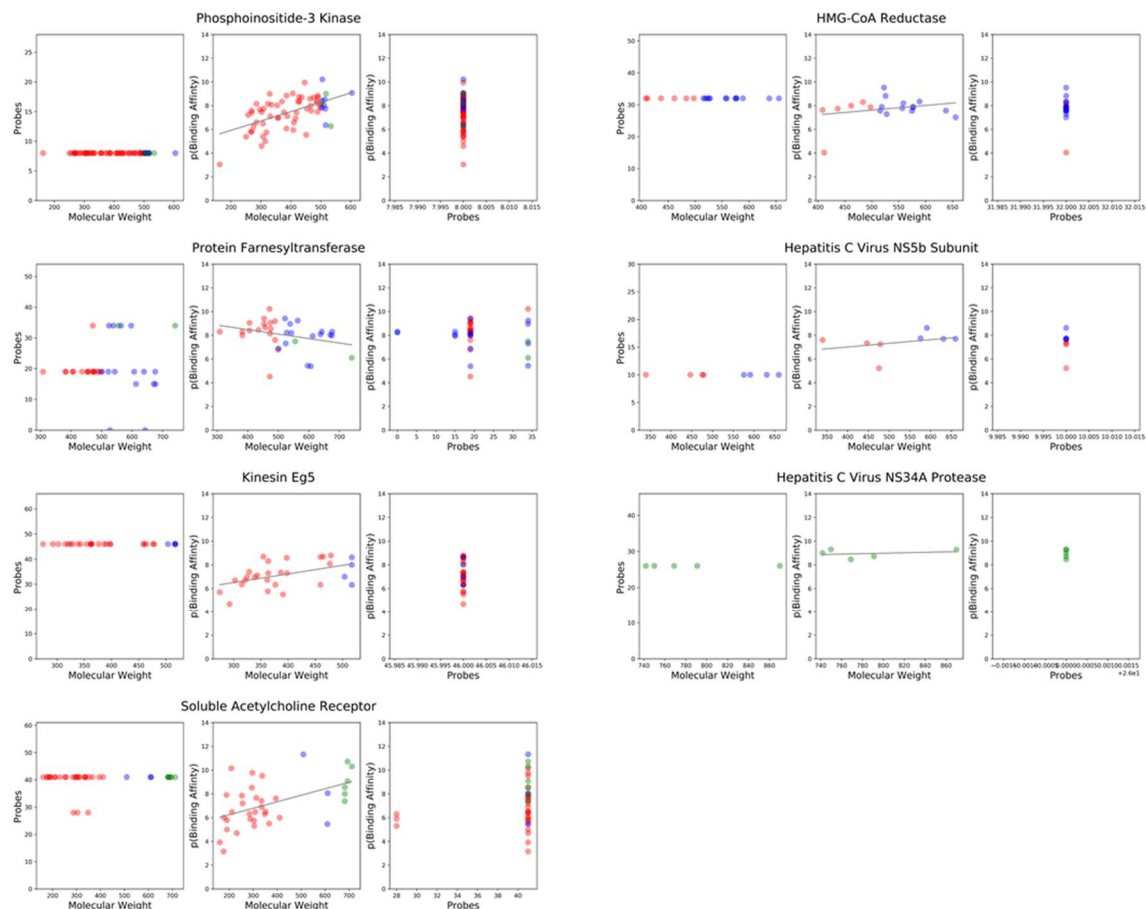

**Figure S6.** Structure-based ligand binding profiles of simple targets with known binding affinity and co-crystal structures with the protein. *Probes* represents the total number of probe clusters utilized by the ligand.  $p(\text{Binding Affinity})$  is the negative log of the binding affinity, expressed as  $K_D$ ,  $K_i$ , or  $IC_{50}$ . *Molecular weight* is that of the ligand, measured in Daltons. Legend: Red = ligands with MW < 500 Da, Blue = eRo5 ligands, Green = bRo5 ligands (see Methods).



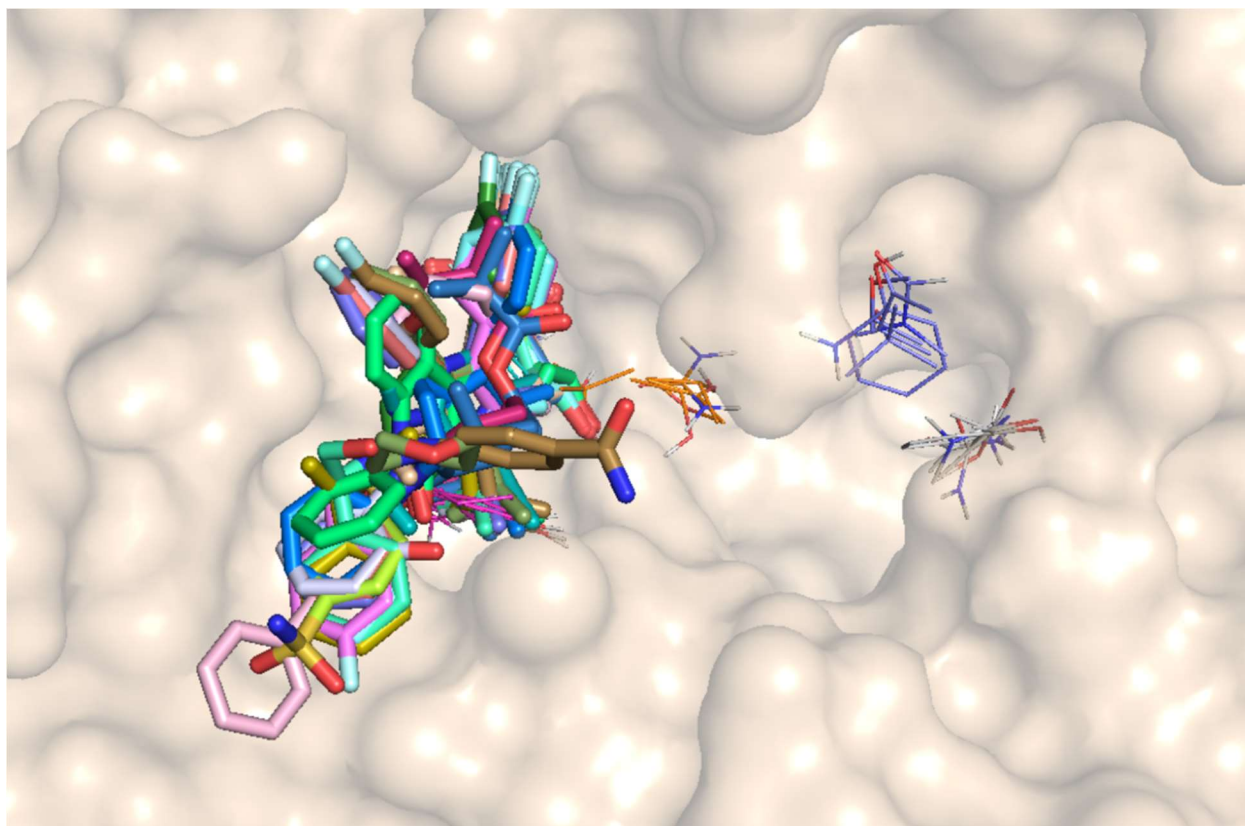

**Figure S7.** The binding site of HMG-CoA reductase (PDB=1HWK) with ligands overlaid. The n=19 ligands associate with three hot spots: 0(13), 1(13), and 6(6), which are mostly covered by the ligands here. Two hot spots: 4(9) and 5(7) exist to the right of the hot spot, but are not utilized by any of the existing ligands.

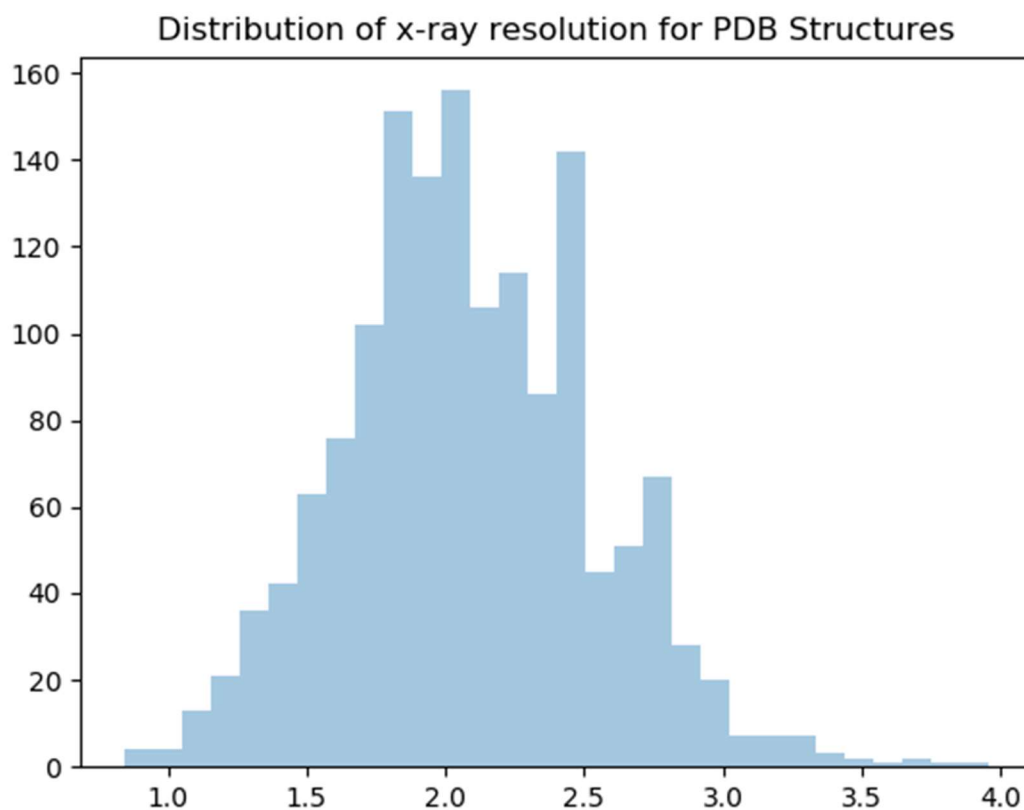

**Figure S8.** Distribution of x-ray resolution for PDB structures of ligands co-crystallized with a protein of interest. All but 5 ligands utilized in the structure-based ligand profiles have structures determined by x-ray crystallography and their resolutions are distributed as displayed.
